# Supplementary material for: Effectiveness of automated alerting system compared to usual care for the management of sepsis
Source: PubMed Central journal article supplement (PMC9296632; doi:10.1038/s41746-022-00650-5), 2022-07-19
Supplement: 41746_2022_650_MOESM1_ESM.pdf [file 41746_2022_650_MOESM1_ESM.pdf]

# Supplemental digital content for Effectiveness of automated alerting system compared to usual care for the management of sepsis: a systematic review and meta-analysis

## Table of Contents

|                                                                                                                           |          |
|---------------------------------------------------------------------------------------------------------------------------|----------|
| <b>Supplementary Methods</b> .....                                                                                        | <b>2</b> |
| <i>Searching strategy in relevant databases</i> .....                                                                     | 2        |
| <i>Supplementary Figure 1 Trends of the number of publications over time stratified by study design</i> .....             | 4        |
| <i>Supplementary Figure 2. Subgroup analysis for mortality outcome stratified by setting</i> .....                        | 5        |
| <i>Supplementary Figure 3. Subgroup analysis for mortality outcome stratified by alerting method</i> .....                | 6        |
| <i>Supplementary Figure 4. Subgroup analysis for mortality outcome stratified by purpose of alerting</i> .....            | 7        |
| <i>Supplementary Figure 5. Bayesian meta-analysis of RCTs for mortality</i> .....                                         | 8        |
| <i>Supplementary Figure 6. Subgroup analysis for ICU length of stay stratified by the study design</i> .....              | 9        |
| <i>Supplementary Figure 7. Subgroup analysis for ICU length of stay stratified by the study setting</i> .....             | 10       |
| <i>Supplementary Figure 8. Subgroup analysis for ICU length of stay stratified by prediction methods</i> .....            | 11       |
| <i>Supplementary Figure 9. Subgroup analysis for ICU length of stay stratified by prediction purpose</i> .....            | 12       |
| <i>Supplementary Figure 10. Subgroup analysis for hospital length of stay stratified by study design</i> .....            | 13       |
| <i>Supplementary Figure 11. Subgroup analysis for hospital length of stay stratified by study setting</i> .....           | 14       |
| <i>Supplementary Figure 12. Subgroup analysis for hospital length of stay stratified by alerting methods</i> .....        | 16       |
| <i>Supplementary Figure 13. Subgroup analysis for hospital length of stay stratified by alerting purpose</i> .....        | 17       |
| <i>Supplementary Figure 14. Subgroup analysis for mortality stratified by different rules to alert sepsis onset</i> ..... | 18       |

## Supplementary Methods

### Searching strategy in relevant databases

The following searching strategy was applied on December 2021

Searching strategy in PubMed

| Item number | Searching words                                                                                                                                                          | Number of items |
|-------------|--------------------------------------------------------------------------------------------------------------------------------------------------------------------------|-----------------|
| 1#          | ((sepsis[Title/Abstract] AND (septic[Title/Abstract])) AND (septicemia[Title/Abstract]))                                                                                 | 161461          |
| 2#          | early warning[Title/Abstract] OR machine learning[Title/Abstract] OR prediction[Title/Abstract] OR artificial intelligence[Title/Abstract] OR detection [Title/Abstract] | 1310072         |
| 3#          | mortality[Title/Abstract] OR length of stay[Title/Abstract]                                                                                                              | 910594          |
| 4#          | randomized[Title/Abstract] OR controlled[Title/Abstract] OR observational[Title/Abstract] OR pre-implementation[Title/Abstract] OR pre-post [Title/Abstract]             | 1374458         |
| 5#          | 1# AND 2# AND 3# AND 4#                                                                                                                                                  | 394             |

### SCOPUS (n = 498)

TITLE-ABS-KEY ( sepsis OR septic ) AND TITLE-ABS-KEY ( ( early AND warning ) OR ( machine AND learning ) OR prediction OR ( artificial AND intelligence ) ) AND TITLE-ABS-KEY ( mortality ) AND TITLE-ABS-KEY ( randomized OR controlled OR pre-implementation OR pre-post ) AND ( LIMIT-TO ( DOCTYPE , "ar" ) )

### WOS (n = 785)

| Item number | Searching words                                                                                                                               | Number of items |
|-------------|-----------------------------------------------------------------------------------------------------------------------------------------------|-----------------|
| 1#          | ((AB=(sepsis)) OR AB=(septic)) OR AB=(septicemia)                                                                                             | 209874          |
| 2#          | (((((AB=(early warning)) OR AB=(machine learning)) OR AB=(prediction)) OR AB=(artificial intelligence)) OR AB=(detection)) OR AB=(automated ) | 6160275         |
| 3#          | (AB=(mortality )) OR AB=(length of stay)                                                                                                      | 1225755         |
| 4#          | (((((AB=(randomized)) OR AB=(controlled)) OR AB=(observational)) OR AB=(pre-implementation)) OR AB=(pre-post)                                 | 18075728        |
| 5#          | 1# AND 2# AND 3# AND 4#                                                                                                                       | 785             |

### MedRxiv (n = 327)

(sepsis OR septic) AND (automated OR alert OR machine learning OR artificial intelligence OR early warning OR prediction) AND (mortality OR length of stay) AND (randomized OR pre-implementation OR pre-post OR controlled OR observational)

**Embase under PICO framework (n = 643)**

('sepsis'/exp OR 'septicemia'/exp OR 'septic shock'/exp) AND ('prediction'/exp OR 'early warning score'/exp OR 'machine learning'/exp OR 'artificial intelligence'/exp OR automated:ti,ab OR detection:ti,ab) AND ('mortality'/exp OR 'length of stay'/exp) AND ('randomized controlled trial'/exp OR 'observational study'/exp)

**Cochrane Central Register of Controlled Trials (CENTRAL) (n = 801)**

"sepsis" OR "septic" OR "septicemia" OR "bacteremia" in Title Abstract Keyword AND "detection" OR "machine learning" OR "early warning" OR "prediction" OR "artificial intelligence" OR "automated" in Title Abstract Keyword AND "mortality" OR "length of stay" in Title Abstract Keyword AND "randomized" OR "controlled" OR "observational" OR "pre-implementation" OR "pre-post" in Title Abstract Keyword - (Word variations have been searched)

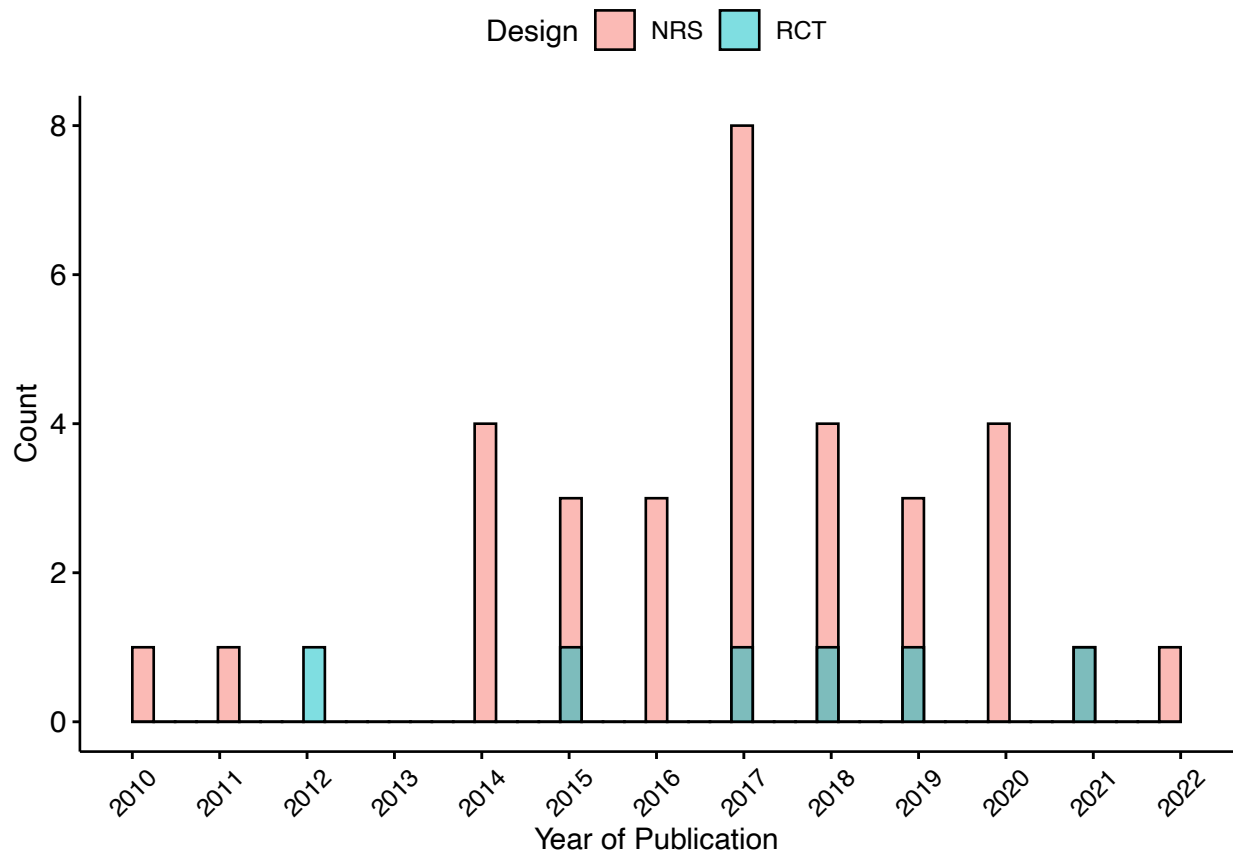

**Supplementary Figure 1 Trends of the number of publications over time stratified by study design.**

NRS = non-randomized study; RCT = randomized controlled trial

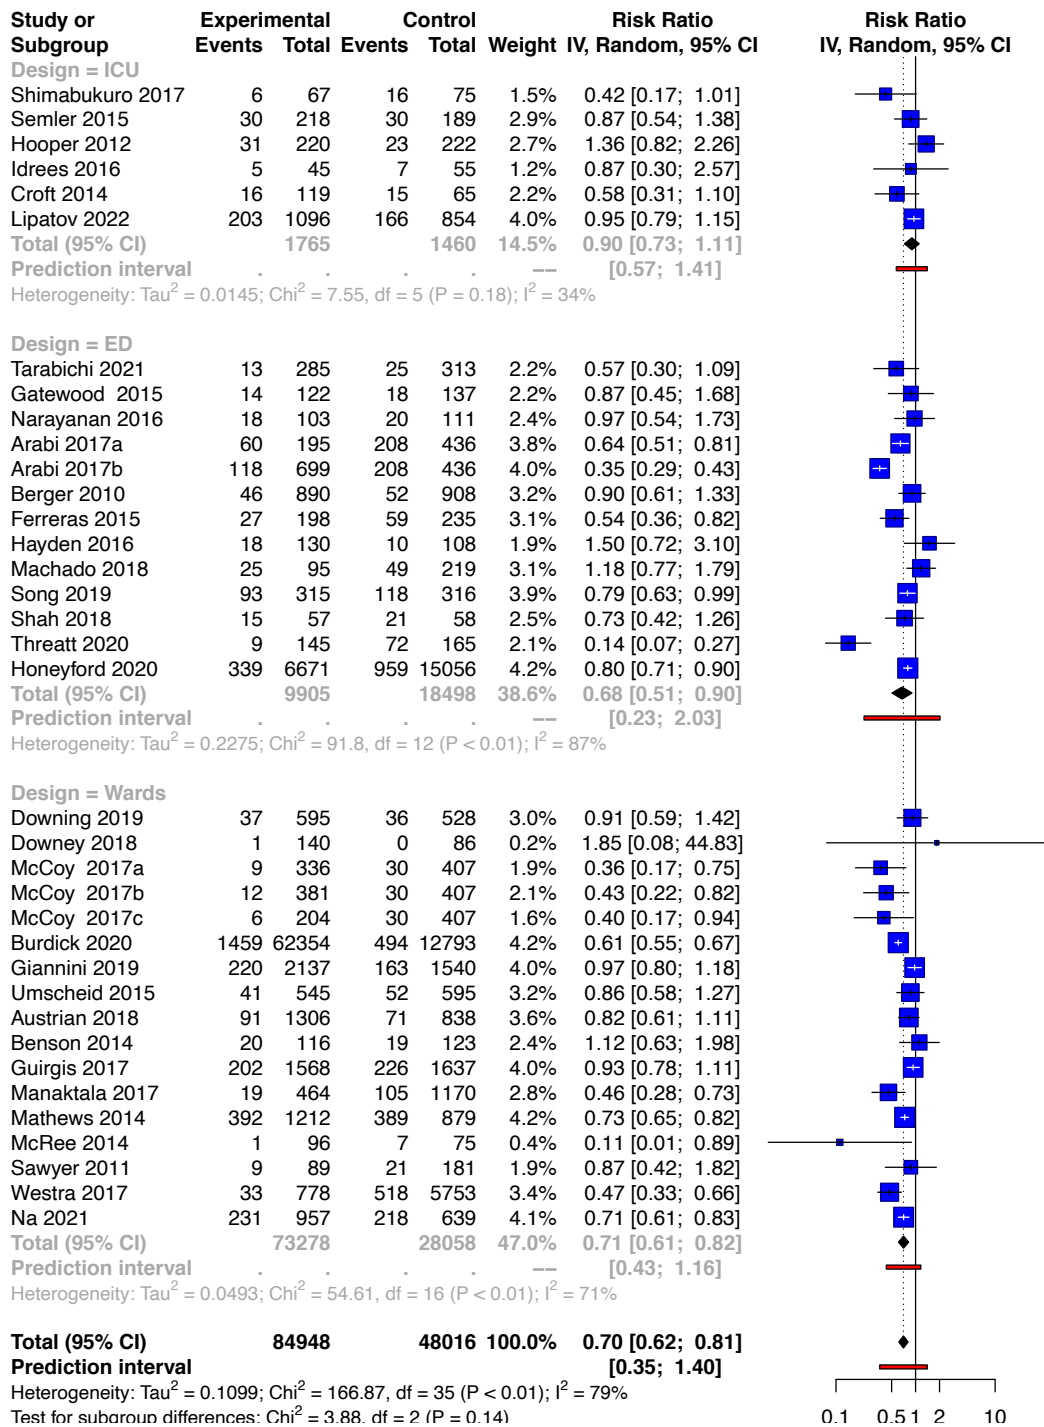

### Supplementary Figure 2. Subgroup analysis for mortality outcome stratified by setting.

The size of the blue square indicates the weight of each individual study. The black diamond represents the pooled effect size for each subgroup as well as for the overall effect. The red bars represent the prediction interval.

Abbreviations: ED = emergency department; ICU = intensive care unit; CI = confidence interval; IV = inverse variance.

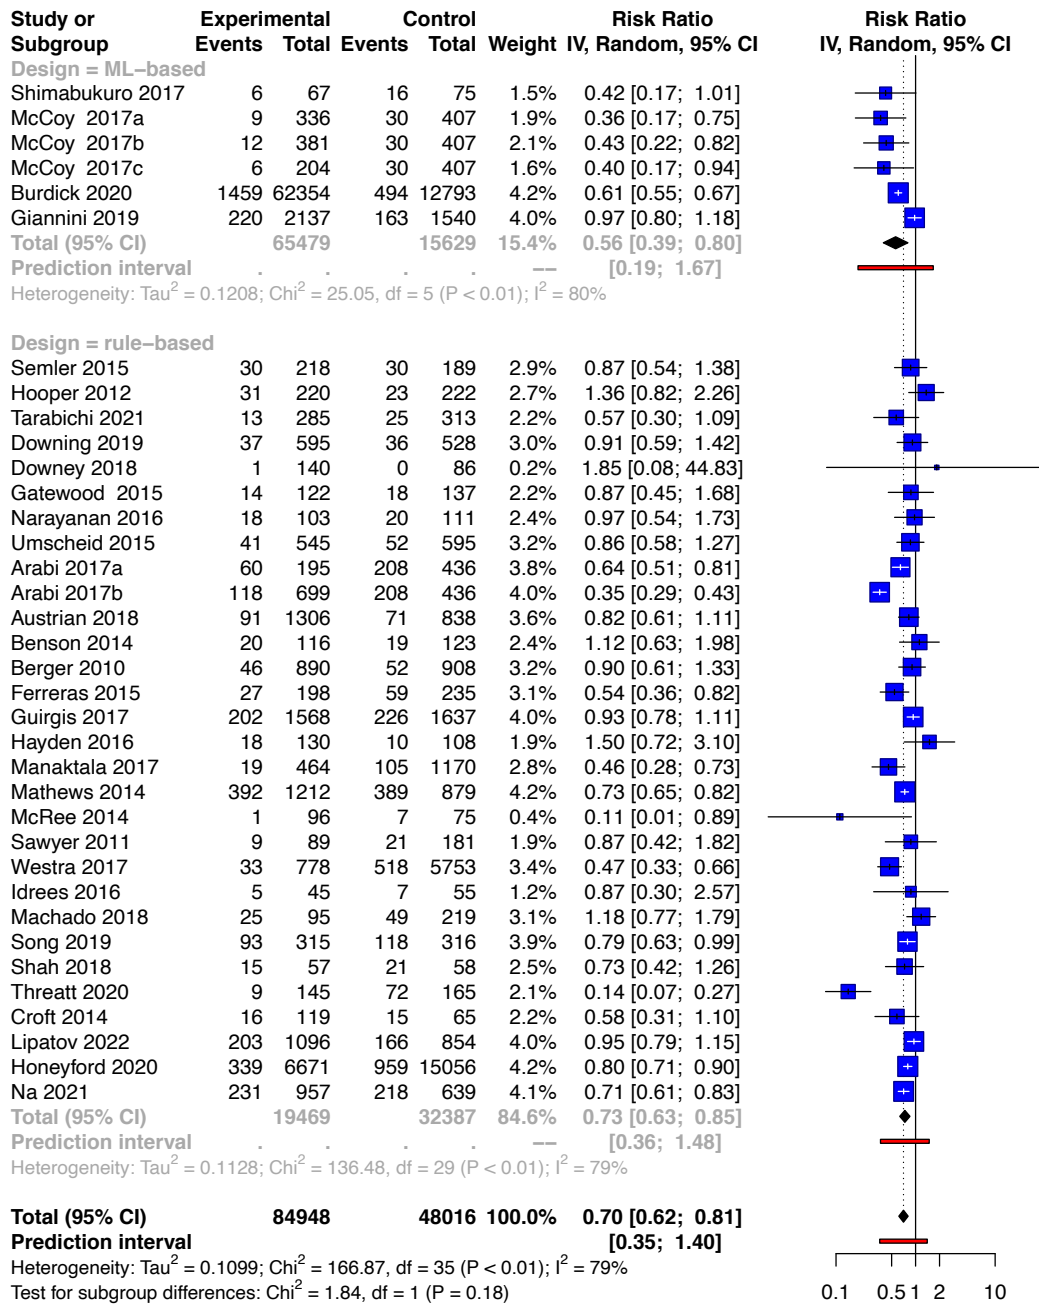

### Supplementary Figure 3. Subgroup analysis for mortality outcome stratified by alerting method.

The size of the blue square indicates the weight of each individual study. The black diamond represents the pooled effect size for each subgroup as well as for the overall effect. The red bars represent the prediction interval.

Abbreviations: ED = emergency department; ICU = intensive care unit; CI = confidence interval; IV = inverse variance.

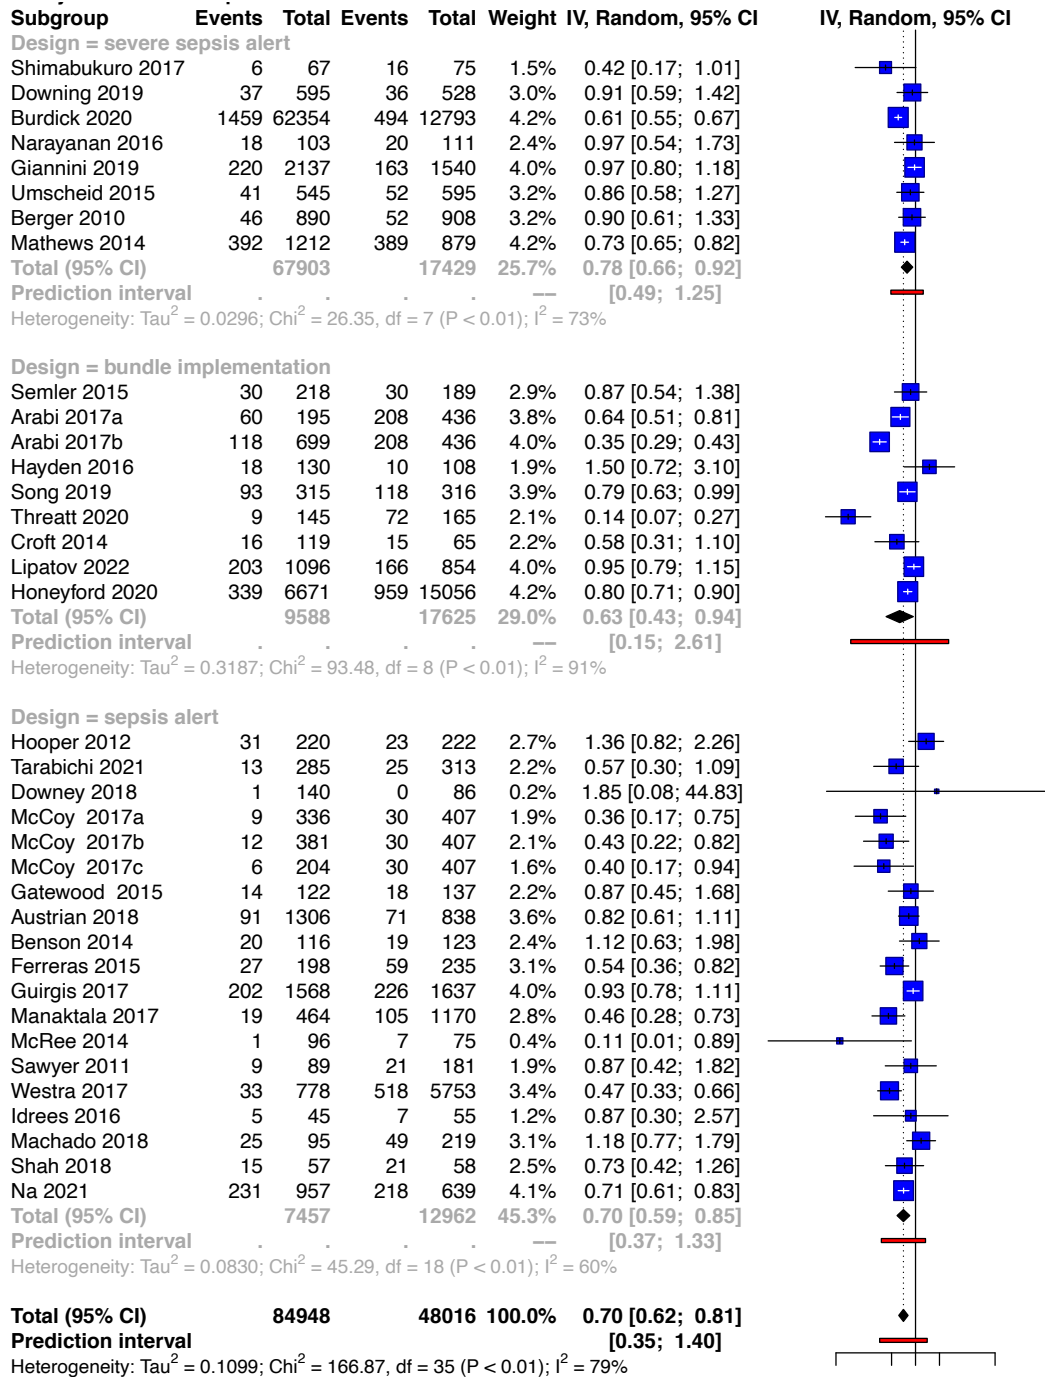

### Supplementary Figure 4. Subgroup analysis for mortality outcome stratified by purpose of alerting.

The size of the blue square indicates the weight of each individual study. The black diamond represents the pooled effect size for each subgroup as well as for the overall effect. The red bars represent the prediction interval.

Abbreviations: ED = emergency department; ICU = intensive care unit; CI = confidence interval; IV = inverse variance.

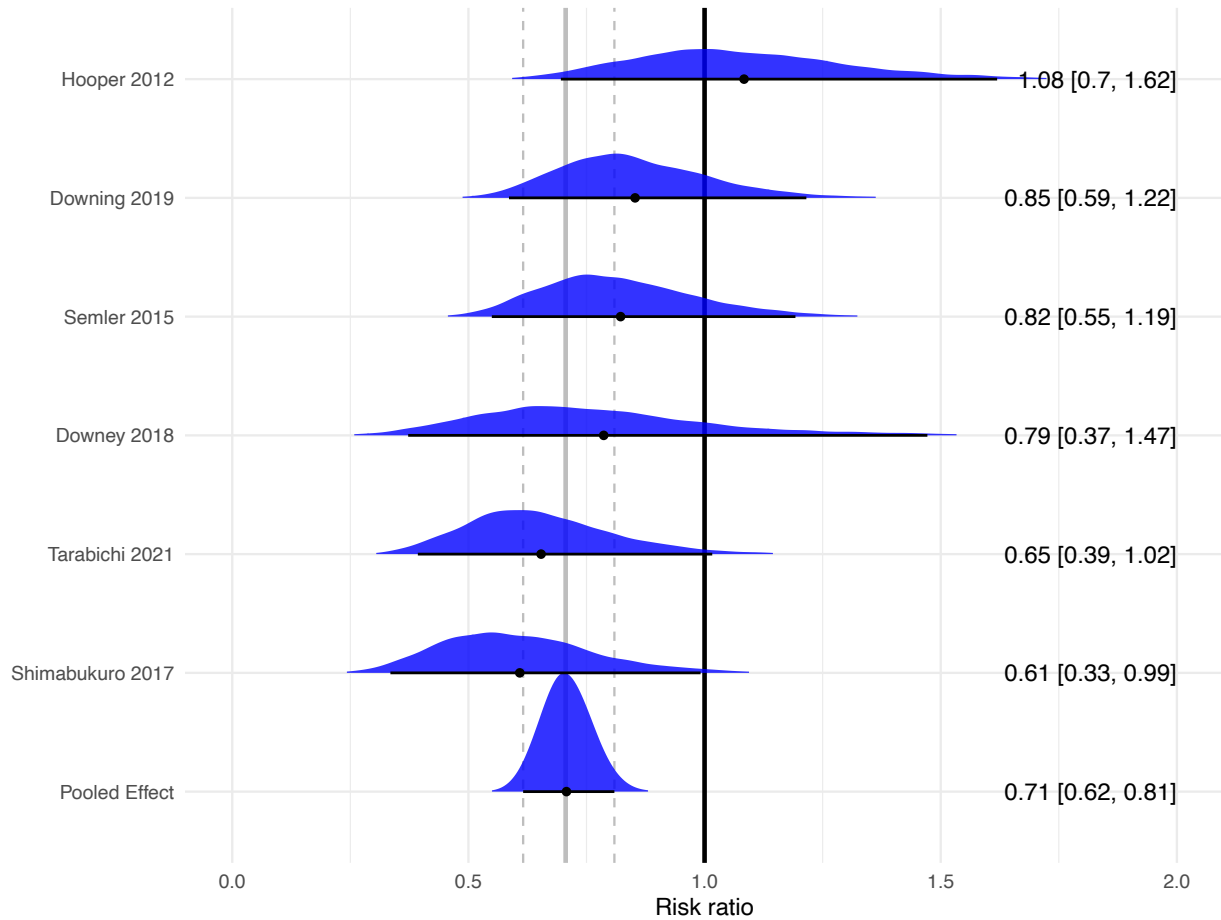

**Supplementary Figure 5. Bayesian meta-analysis of RCTs for mortality.**

Pooled metrics from non-randomized studies were employed as the prior. The effect measure is the risk ratio, and a value <1 indicates beneficial effect of the automated alerting system. The blue shaded area represents the posterior distribution for each individual study as well as for the pooled effects.



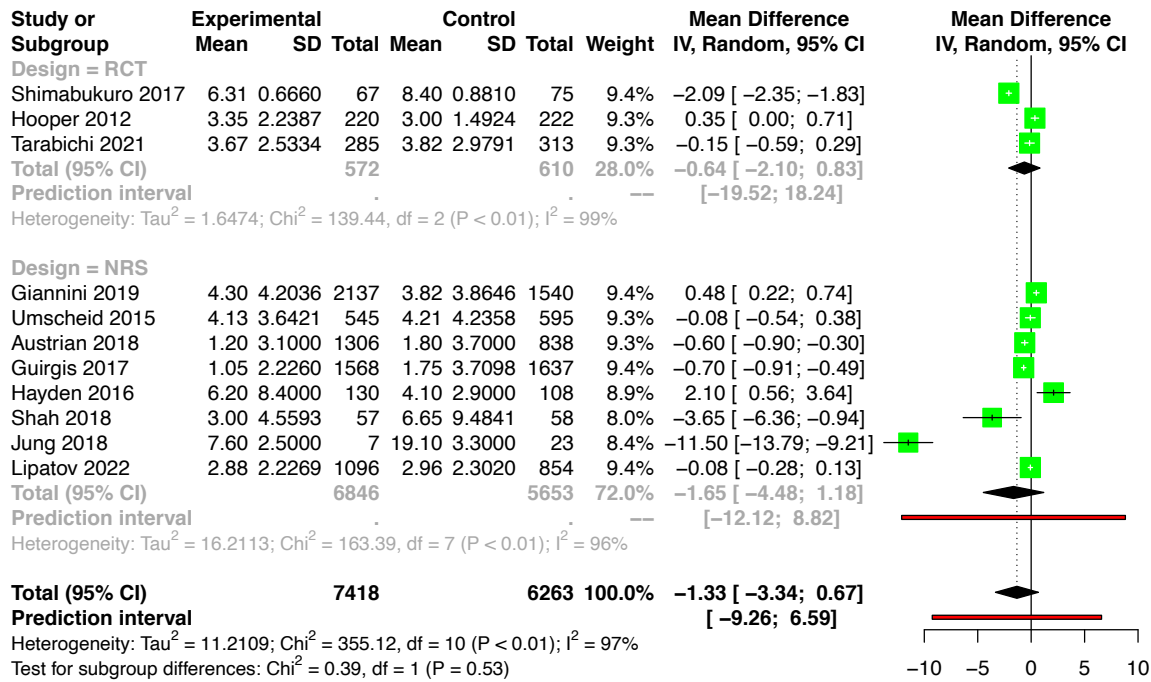

**Supplementary Figure 6. Subgroup analysis for ICU length of stay stratified by the study design.**

The size of the green square indicates the weight of each individual study. The black diamond represents the pooled effect size for each subgroup as well as for the overall effect. The red bars represent the prediction interval.

Abbreviations: RCT = randomized controlled trial; ICU = intensive care unit; CI = confidence interval; IV = inverse variance.

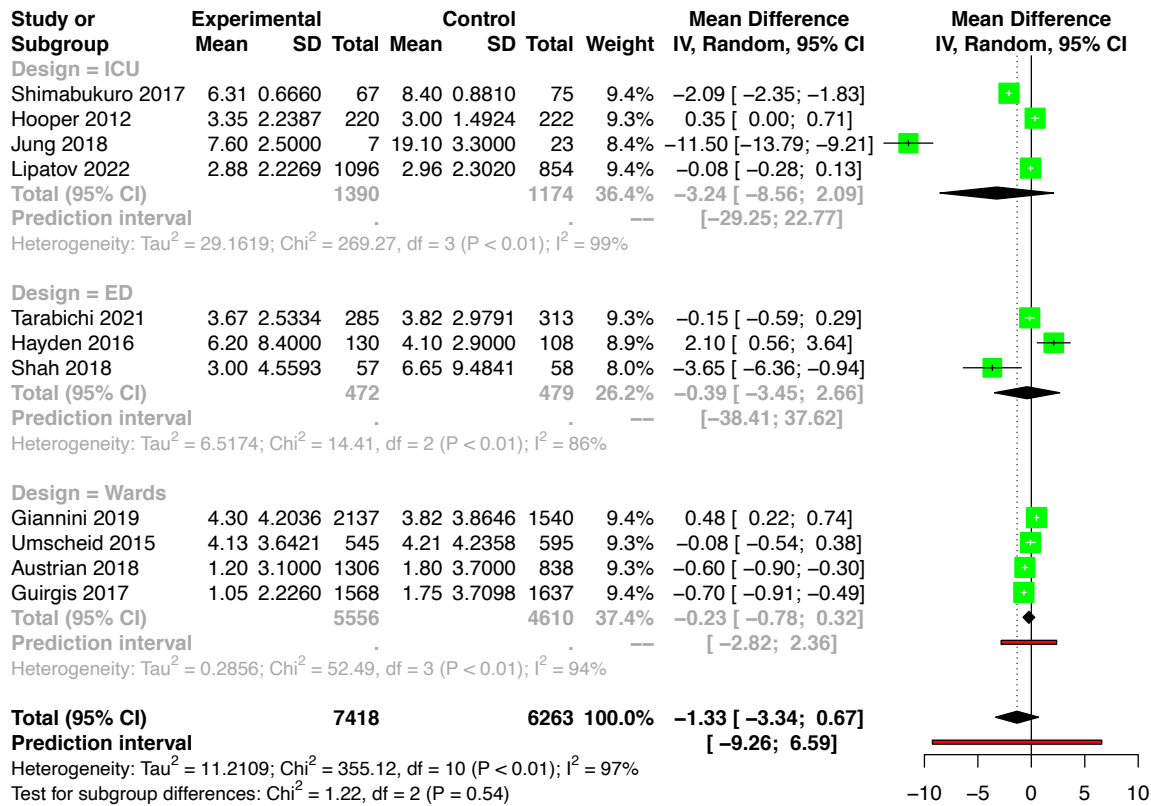

### Supplementary Figure 7. Subgroup analysis for ICU length of stay stratified by the study setting.

The size of the green square indicates the weight of each individual study. The black diamond represents the pooled effect size for each subgroup as well as for the overall effect. The red bars represent the prediction interval.

Abbreviations: ED = emergency department; ICU = intensive care unit; CI = confidence interval; IV = inverse variance.

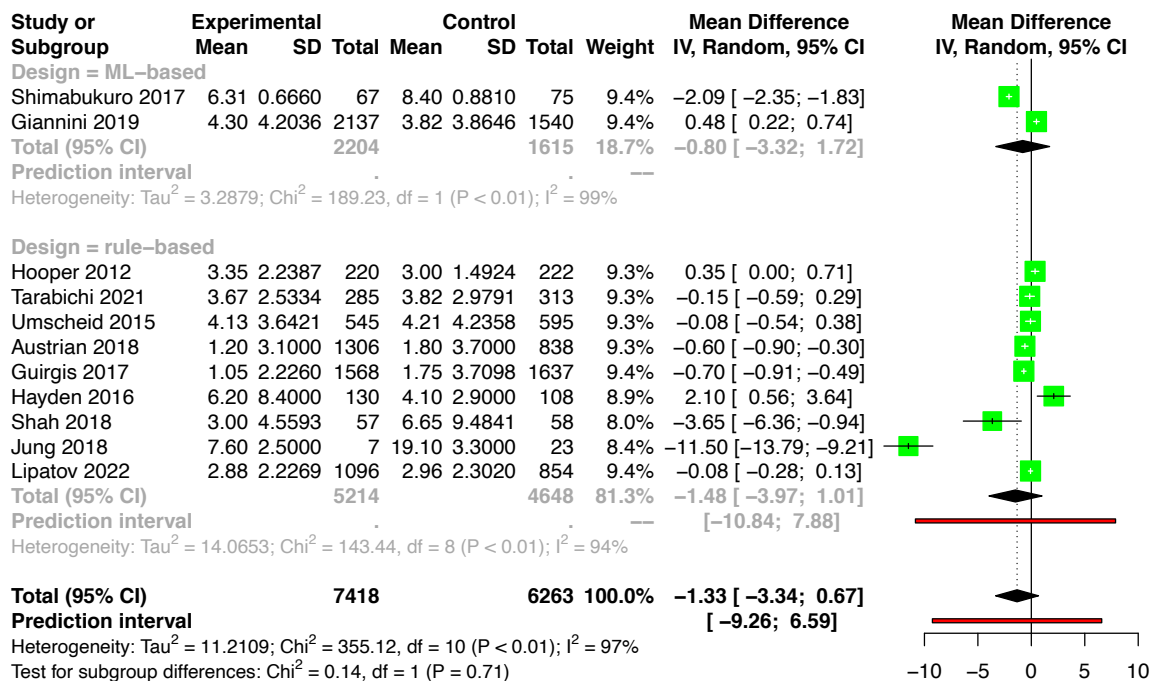

### Supplementary Figure 8. Subgroup analysis for ICU length of stay stratified by prediction methods.

The size of the green square indicates the weight of each individual study. The black diamond represents the pooled effect size for each subgroup as well as for the overall effect. The red bars represent the prediction interval.

Abbreviations: ML = machine learning; ICU = intensive care unit; CI = confidence interval; IV = inverse variance.

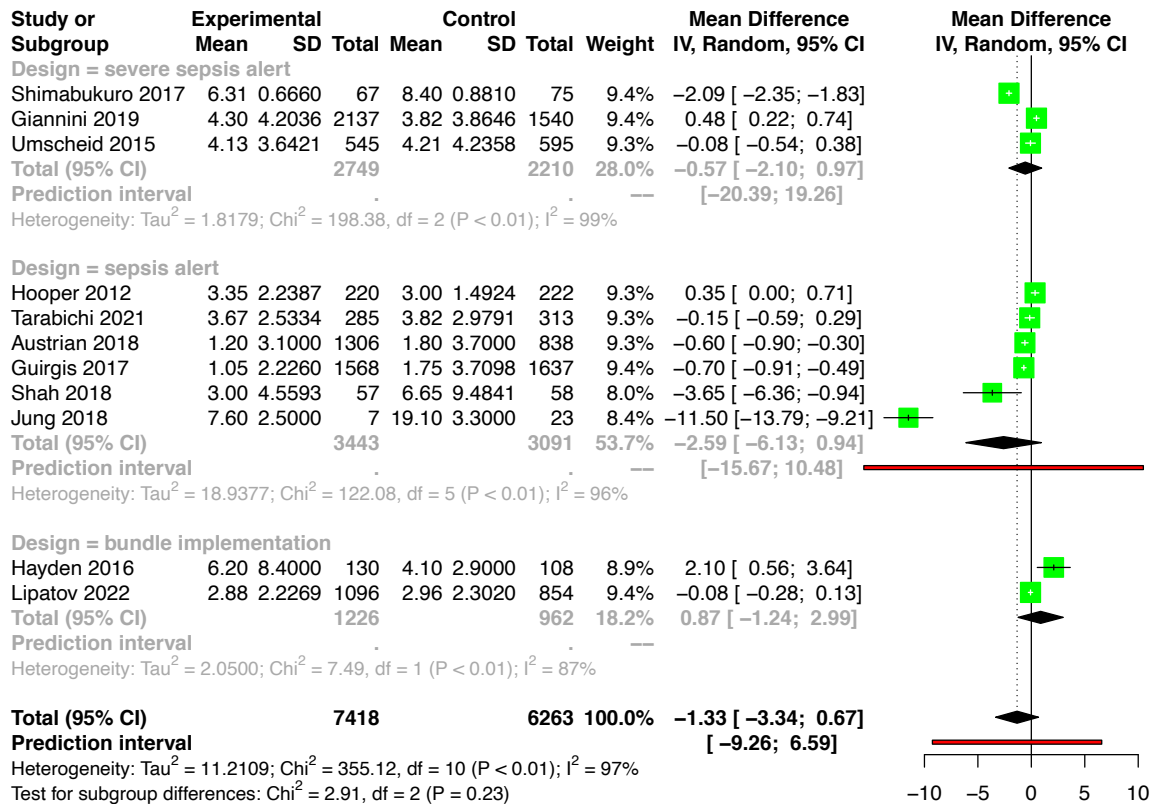

### Supplementary Figure 9. Subgroup analysis for ICU length of stay stratified by prediction purpose.

The size of the green square indicates the weight of each individual study. The black diamond represents the pooled effect size for each subgroup as well as for the overall effect. The red bars represent the prediction interval.

Abbreviations: SD = standard deviation; ICU = intensive care unit; CI = confidence interval; IV = inverse variance.

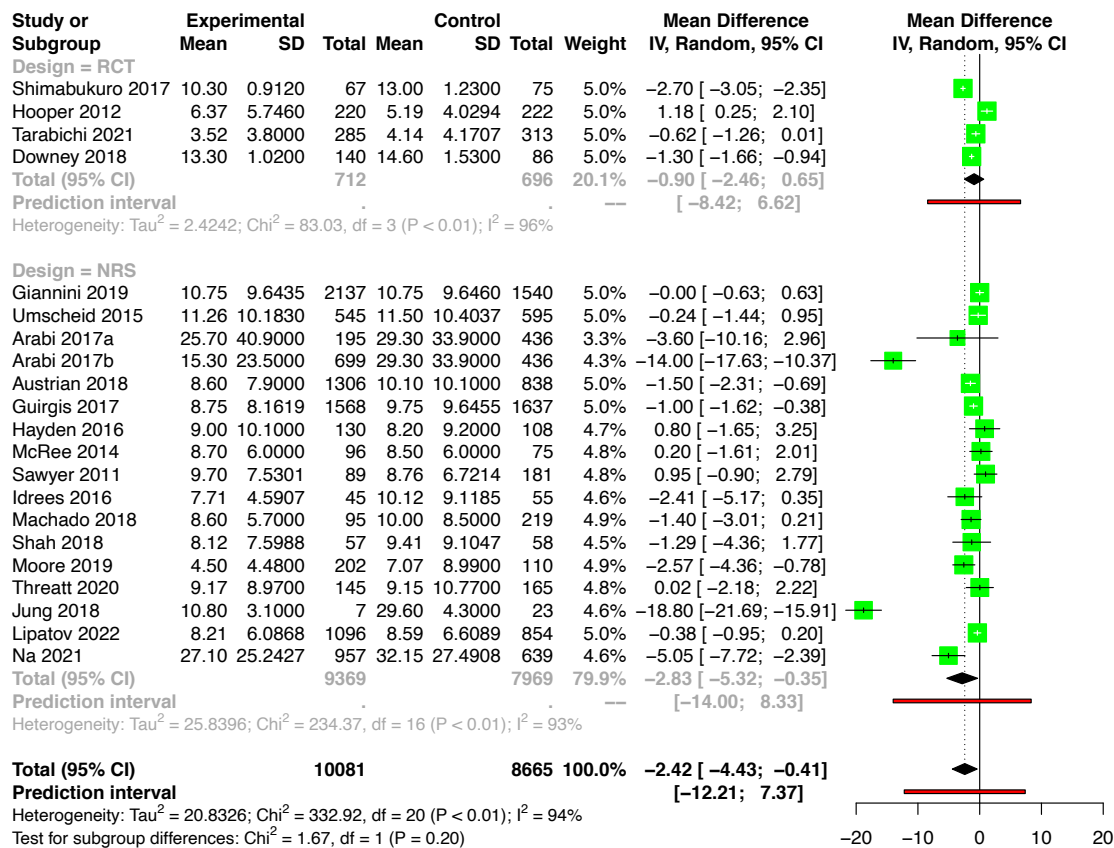

### Supplementary Figure 10. Subgroup analysis for hospital length of stay stratified by study design.

The size of the green square indicates the weight of each individual study. The black diamond represents the pooled effect size for each subgroup as well as for the overall effect. The red bars represent the prediction interval.

Abbreviations: SD = standard deviation; RCT = randomized controlled trial; CI = confidence interval; IV = inverse variance.

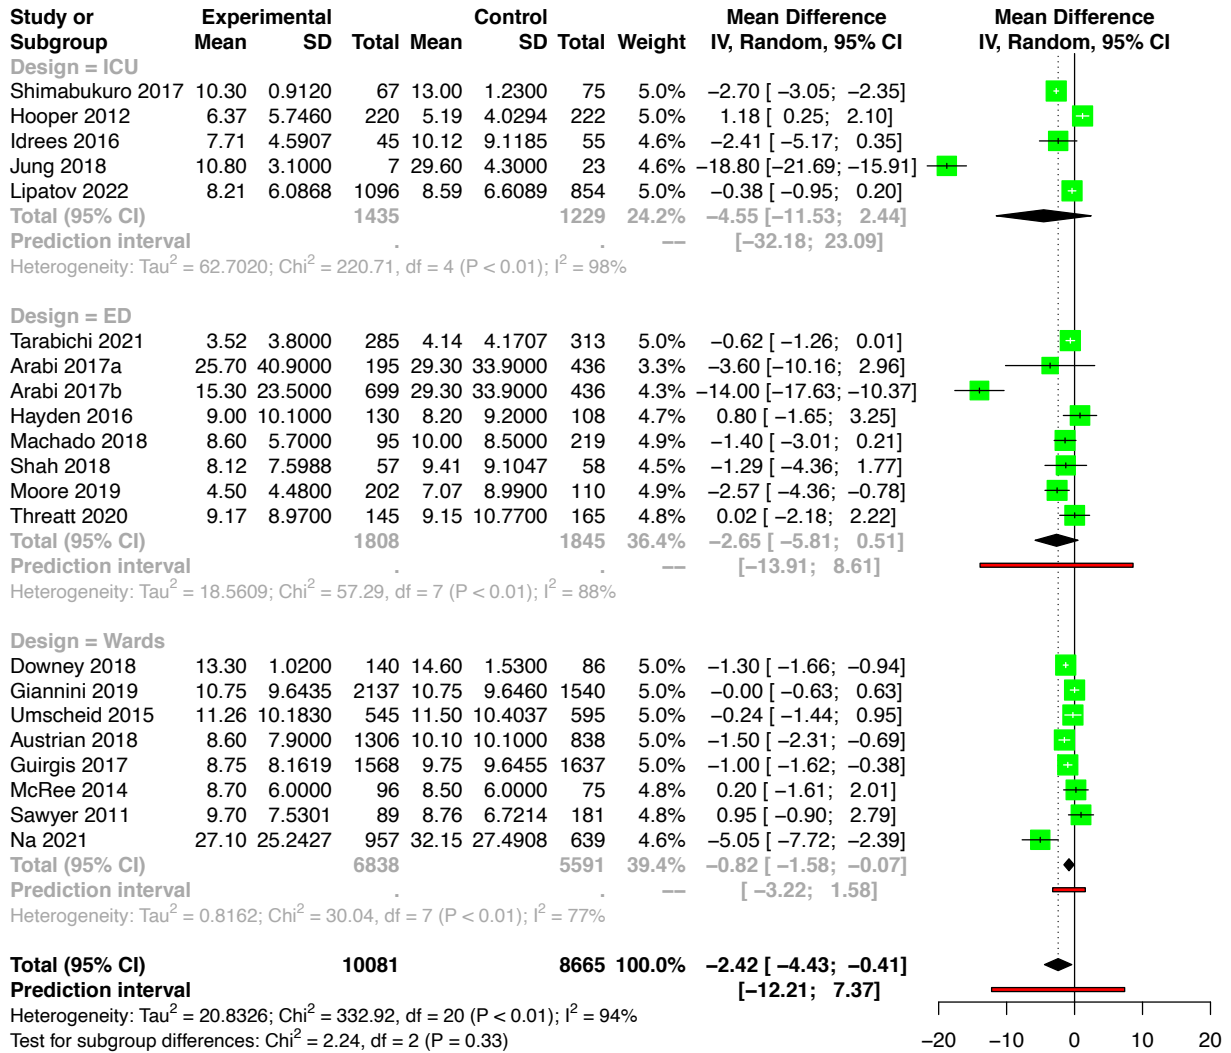

### Supplementary Figure 11. Subgroup analysis for hospital length of stay stratified by study setting.

The size of the green square indicates the weight of each individual study. The black diamond represents the pooled effect size for each subgroup as well as for the overall effect. The red bars represent the prediction interval.

Abbreviations: SD = standard deviation; ED = emergency department; ICU = intensive care unit; CI = confidence interval; IV = inverse variance.

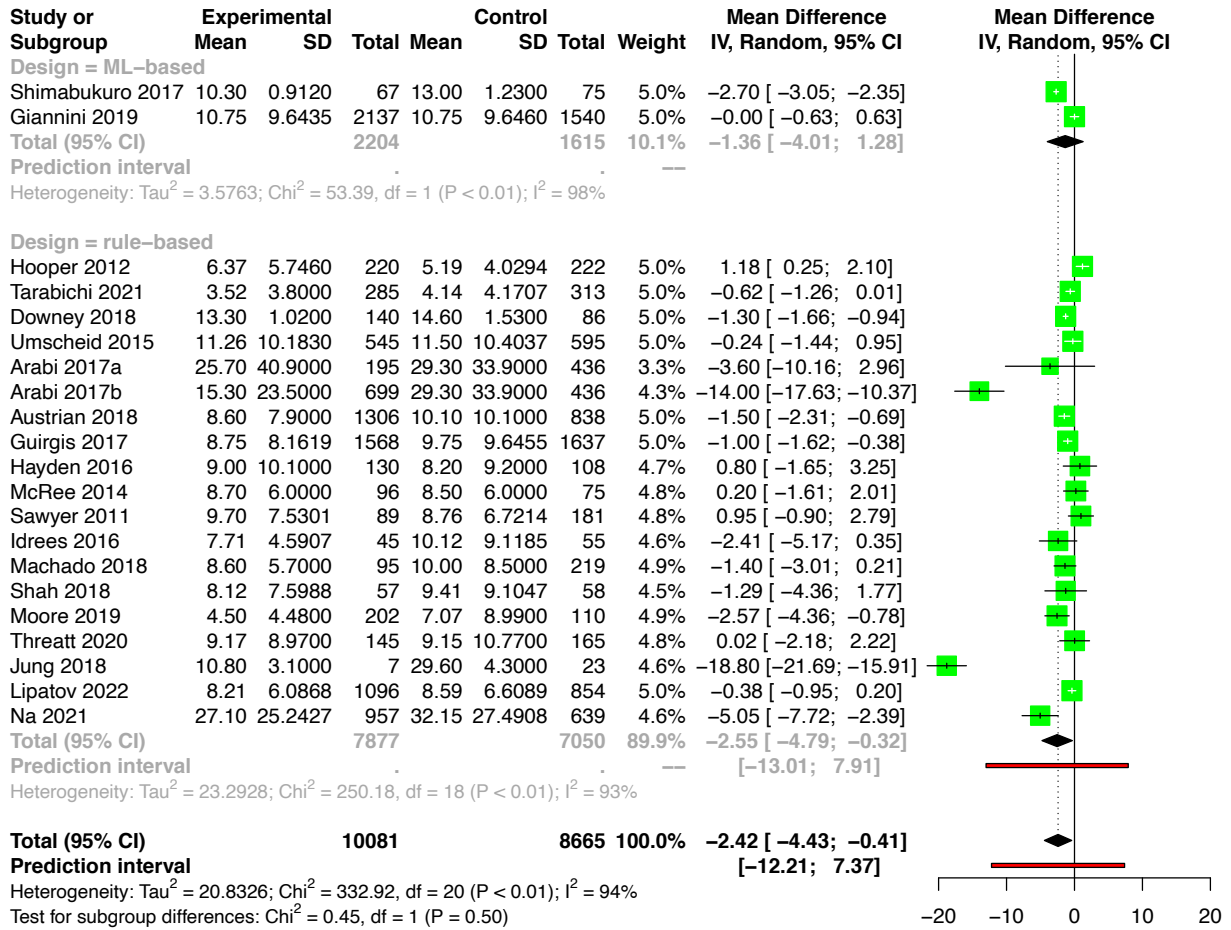

### Supplementary Figure 12. Subgroup analysis for hospital length of stay stratified by alerting methods.

The size of the green square indicates the weight of each individual study. The black diamond represents the pooled effect size for each subgroup as well as for the overall effect. The red bars represent the prediction interval.

Abbreviations: SD = standard deviation; ML = machine learning; CI = confidence interval; IV = inverse variance.



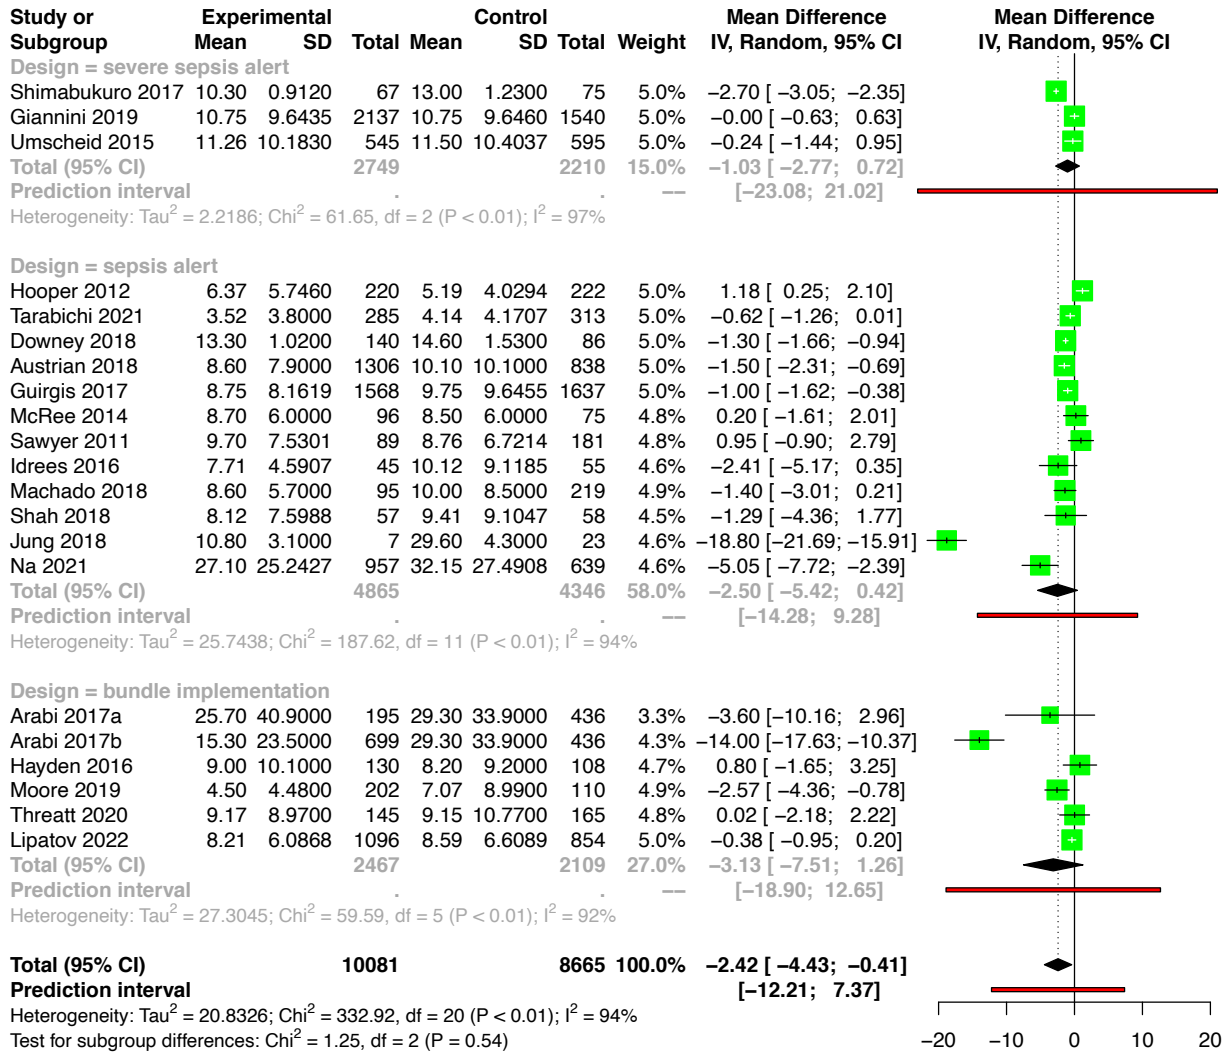

### Supplementary Figure 13. Subgroup analysis for hospital length of stay stratified by alerting purpose.

The size of the green square indicates the weight of each individual study. The black diamond represents the pooled effect size for each subgroup as well as for the overall effect. The red bars represent the prediction interval.

Abbreviations: SD = standard deviation; CI = confidence interval; IV = inverse variance.

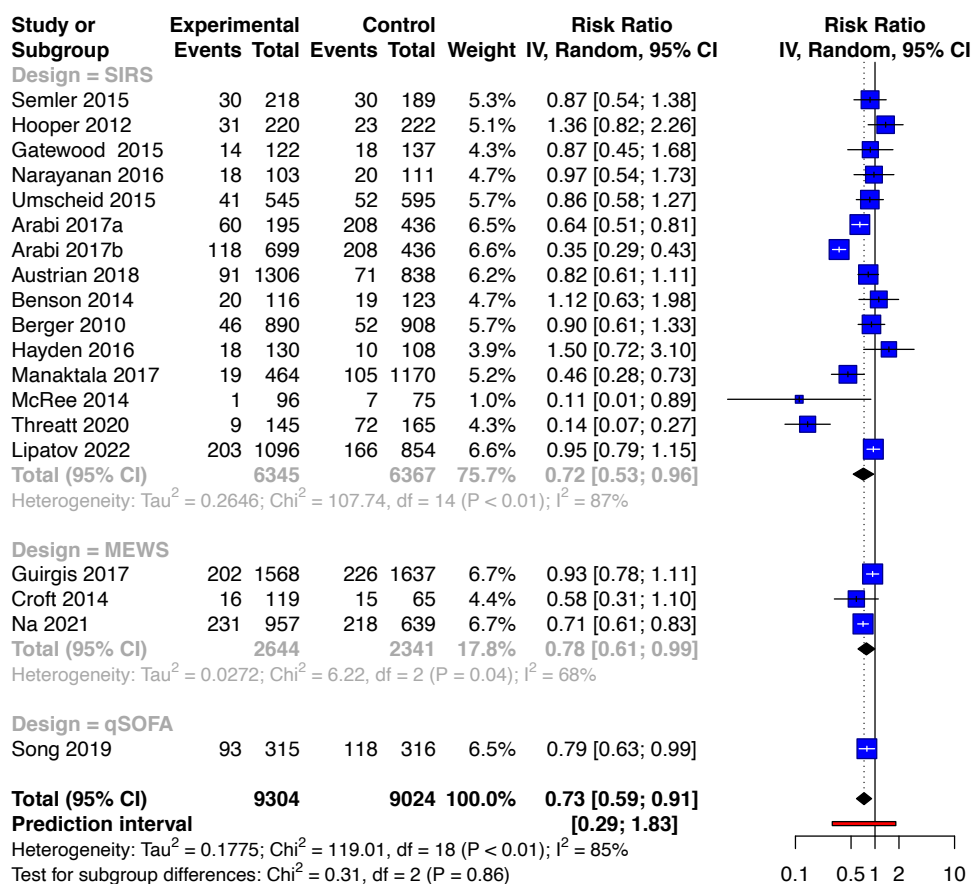

### Supplementary Figure 14. Subgroup analysis for mortality stratified by different rules to alert sepsis onset.

The size of the green square indicates the weight of each individual study. The black diamond represents the pooled effect size for each subgroup as well as for the overall effect. The red bars represent the prediction interval.

Abbreviations: SD = standard deviation; CI = confidence interval; IV = inverse variance; SIRS = systematic inflammatory response syndrome; qSOFA = quick Sepsis Related Organ Failure Assessment; MEWS = Modified Early Warning Score.
